# Supplementary material for: Plant polyphenol-involved coordination assembly-derived Mo3Co3C/Mo2C/Co@NC with phase regulation and interface engineering for efficient hydrogen evolution reaction electrocatalysis
Source: Royal Society of Chemistry journal article supplement (doi:10.1039/d2nj01810a), 2022-01-01
Supplement: d2nj01810a1.pdf [file d2nj01810a1.pdf]

# Supporting Information

**Plant polyphenols involved coordination assemblies derived Mo<sub>3</sub>Co<sub>3</sub>C/Mo<sub>2</sub>C/Co@NC with phase regulation and interface engineering for hydrogen evolution reaction electrocatalysis**

Yu-Hang Zhao,<sup>a</sup> Tao Zhang,<sup>a</sup> Xiao-Feng Wang,<sup>b</sup> Shao-Jie Li,<sup>a</sup> Yu Pan,<sup>c</sup> Yihan Wang,<sup>a</sup> Xue-Zhi Song<sup>\*,a</sup> and Zhenquan Tan<sup>\*,a</sup>

*<sup>a</sup>State Key Laboratory of Fine Chemicals, School of Chemical Engineering, Dalian University of Technology, Panjin Campus, Panjin 124221, China*

*<sup>b</sup>Key Laboratory of Materials Modification by Laser Ion and Electron Beams, Ministry of Education, Dalian University of Technology, Dalian, 116024, China*

*<sup>c</sup>Institute of Functional Textiles and Advanced Materials, College of Textiles and Clothing, State Key Laboratory of Bio-Fibers and Eco-textiles, Qingdao University, Qingdao 266071, China*

Email address: songxz@dlut.edu.cn      tanzq@dlut.edu.cn

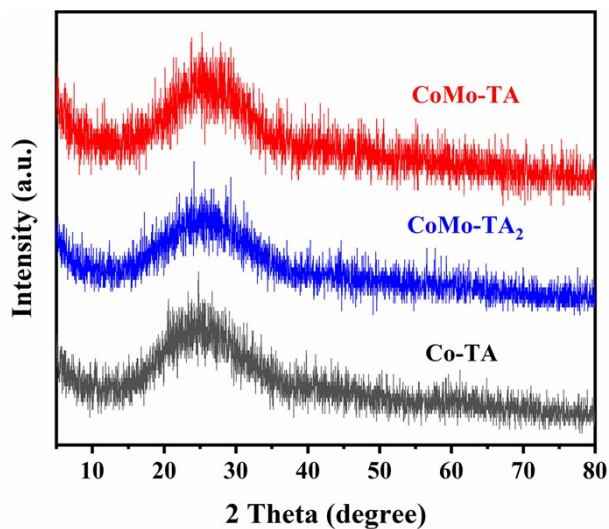

Fig. S1 XRD patterns of Co-TA, CoMo-TA and CoMo-TA<sub>2</sub>.

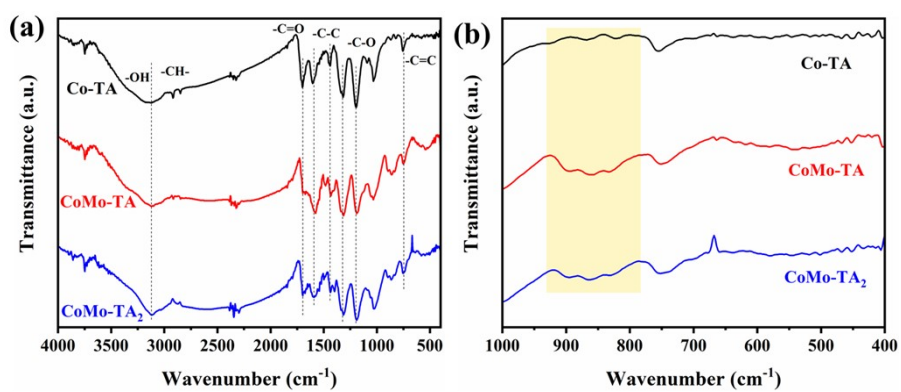

Fig. S2 FTIR images of Co-TA, CoMo-TA and CoMo-TA<sub>2</sub>.

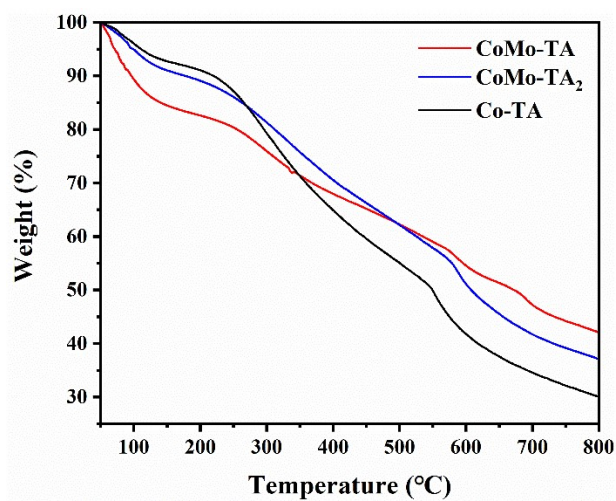

Fig. S3 TGA images of Co-TA, CoMo-TA and CoMo-TA<sub>2</sub>.

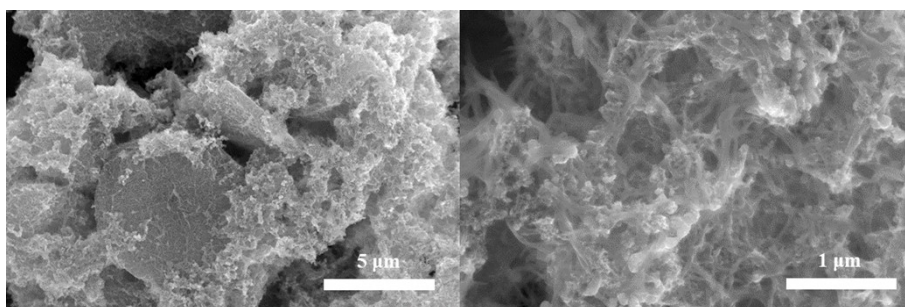

Fig. S4 SEM images of  $\text{Mo}_3\text{Co}_3\text{C}/\text{Co@NC}$ .

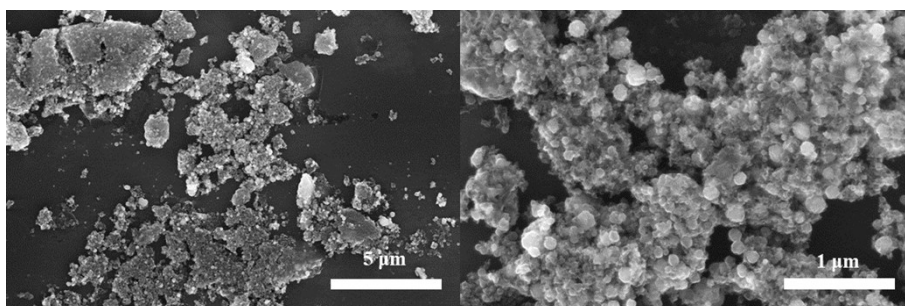

Fig. S5 SEM images of  $\text{Co@NC}$ .

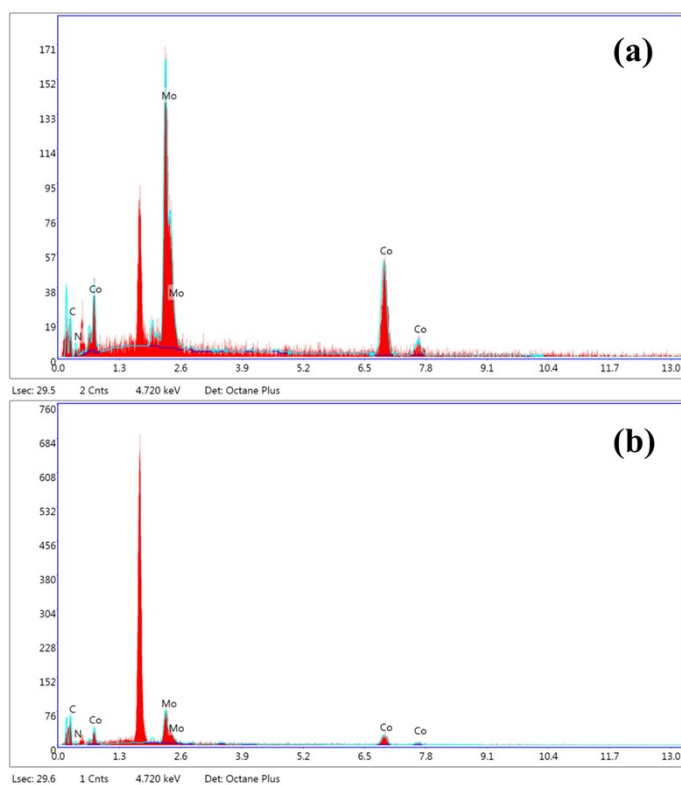

Fig. S6 EDS images of  $\text{Mo}_3\text{Co}_3\text{C}/\text{Mo}_2\text{C}/\text{Co@NC}$  (a) and  $\text{Mo}_3\text{Co}_3\text{C}/\text{Co@NC}$  (b).

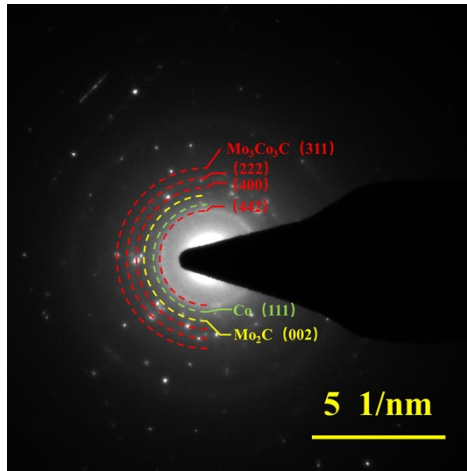

Fig. S7 SAED image of Mo<sub>3</sub>Co<sub>3</sub>C/Mo<sub>2</sub>C/Co@NC.

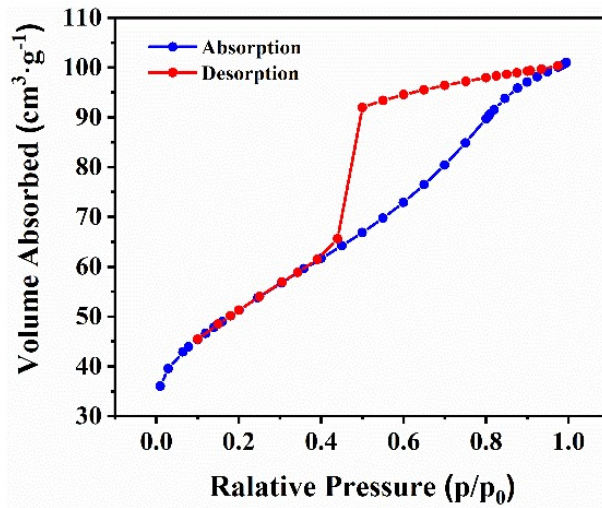

Fig. S8 Adsorption-desorption isotherm of Mo<sub>3</sub>Co<sub>3</sub>C/Mo<sub>2</sub>C/Co@NC.

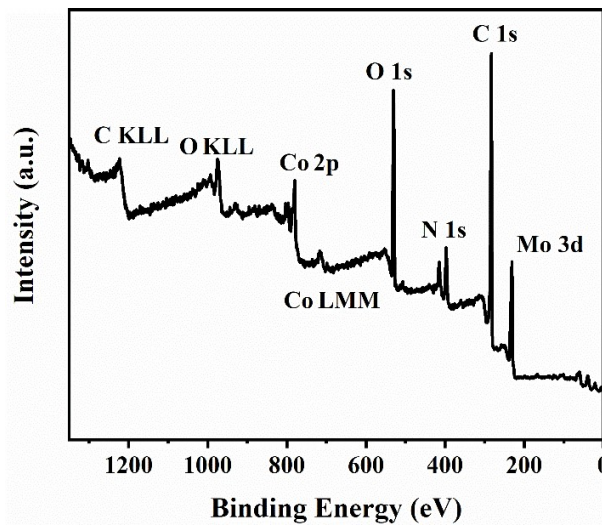

Fig. S9 Full XPS spectrum of Mo<sub>3</sub>Co<sub>3</sub>C/Mo<sub>2</sub>C/Co@NC.

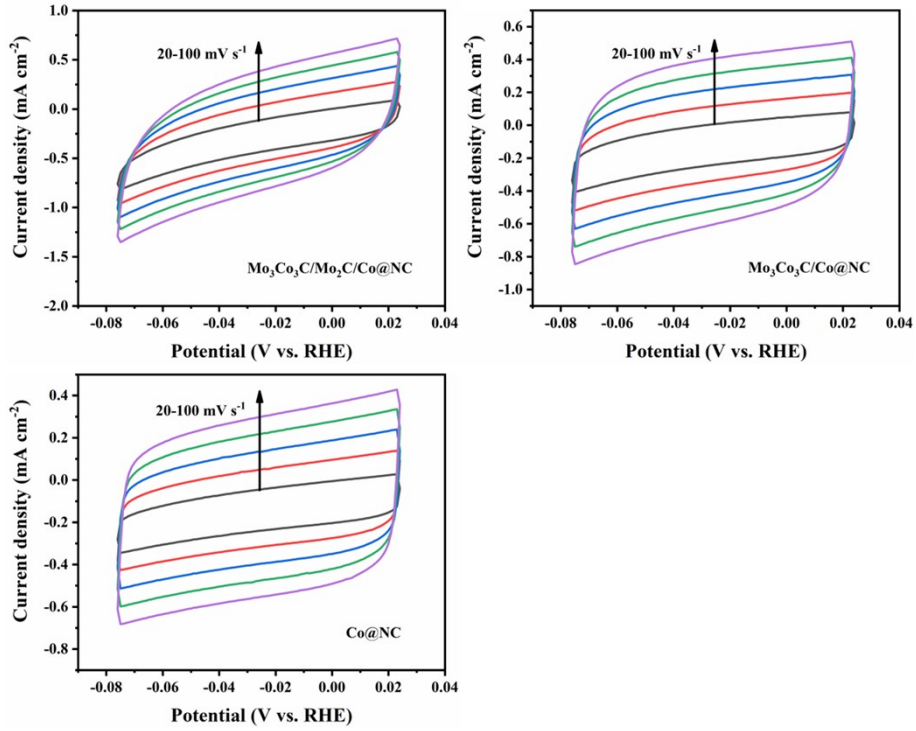

Fig. S10 The cyclic voltammograms of  $\text{Mo}_3\text{Co}_3\text{C}/\text{Mo}_2\text{C}/\text{Co@NC}$ ,  $\text{Mo}_3\text{Co}_3\text{C}/\text{Co@NC}$  and  $\text{Co@NC}$ .

Table S1. The element content of  $\text{Mo}_3\text{Co}_3\text{C}/\text{Mo}_2\text{C}/\text{Co@NC}$  and  $\text{Mo}_3\text{Co}_3\text{C}/\text{Co@NC}$  (Atom%).

|                                                                   | Co    | Mo    | C     | N     |
|-------------------------------------------------------------------|-------|-------|-------|-------|
| $\text{Mo}_3\text{Co}_3\text{C}/\text{Mo}_2\text{C}/\text{Co@NC}$ | 18.61 | 12.93 | 46.05 | 22.41 |
| $\text{Mo}_3\text{Co}_3\text{C}/\text{Co@NC}$                     | 5.91  | 4.19  | 63.66 | 26.24 |

Table S2. Comparison of the HER performance for  $\text{Mo}_3\text{Co}_3\text{C}/\text{Mo}_2\text{C}/\text{Co@NC}$  catalyst with other electrocatalysts in alkaline solution.

| Catalyst                                                                      | Loading mass<br>( $\text{mg cm}^{-2}$ ) | $\eta_{10}$<br>[mV] | Tafel slope<br>[ $\text{mV dec}^{-1}$ ] | Ref       |
|-------------------------------------------------------------------------------|-----------------------------------------|---------------------|-----------------------------------------|-----------|
| $\text{Mo}_3\text{Co}_3\text{C}/\text{Mo}_2\text{C}/\text{Co@NC}$             | 0.326                                   | 211                 | 96                                      | This work |
| $\text{Mo}_2\text{C}/\text{NCS-6}$                                            | 0.0192                                  | 142                 | 56.1                                    | 1         |
| AMP 800/12( $\text{Mo}_2\text{C}$ )                                           | 0.461                                   | 197.9               | 69.2                                    | 2         |
| $\text{Co}_2\text{P}/\text{Mo}_3\text{Co}_3\text{C}/\text{Mo}_2\text{C}@C$    | 0.8                                     | 154                 | 65                                      | 3         |
| $\text{NiMo}_2\text{C}@C$                                                     | 0.15                                    | 181                 | 84                                      | 4         |
| $\text{C-MoS}_2$                                                              | 0.343                                   | 200                 | 53                                      | 5         |
| 2% $\text{Co-Mo}_2\text{C}$                                                   | 0.272                                   | 243                 | 89                                      | 6         |
| $\text{Co}_6\text{Mo}_6\text{C}_2/\text{Co}_2\text{Mo}_3\text{O}_8@\text{NC}$ | 0.8                                     | 220                 | 104.7                                   | 7         |
| $\text{Mo}_2\text{C}/\text{N-rGO}$                                            | 0.25                                    | 142                 | 101.78                                  | 8         |

## Reference

1. Y. Hui, C. Yingxi, W. Chunbao and W. Guangjin, *J. Alloys Compd.*, 2020, **842**, 155939.
2. R. A. Mir and O. P. Pandey, *Sustain. Energy Fuels*, 2020, **4**, 655-669.
3. X. Li, X. Wang, J. Zhou, L. Han, C. Sun, Q. Wang and Z. Su, *J. Mater. Chem. A*, 2018, **6**, 5789-5796.
4. X. Li, L. Yang, T. Su, X. Wang, C. Sun and Z. Su, *J. Mater. Chem. A*, 2017, **5**, 5000-5006.
5. J. Feng, H. Zhou, J. Wang, T. Bian, J. Shao and A. Yuan, *Int. J. Hydrogen Energy*, 2018, **43**, 20538-20545.
6. M. Chen, Y. Ma, Y. Zhou, C. Liu, Y. Qin, Y. Fang, G. Guan, X. Li, Z. Zhang and T. Wang, *Catalysts*, 2018, **8**, 294.
7. R. Liu, M. Anjass, S. Greiner, S. Liu, D. Gao, J. Biskupek, U. Kaiser, G. Zhang and C. Streb, *Chem. Eur. J.*, 2020, **26**, 4157-4164.
8. G. Zhang, Y. Zhou and F. Yang, *Electrochim. Acta*, 2019, **299**, 672-681.
